# Supplementary material for: Characteristics and biomarkers of patients with central nervous system infection admitted to a referral hospital in Northern Vietnam
Source: PubMed Central journal article supplement (PMC8139123; doi:10.1186/s41182-021-00322-2), 2021-05-21
Supplement: 41182_2021_322_MOESM3_ESM.pdf [file 41182_2021_322_MOESM3_ESM.pdf]

## ANNEX 1

# Clinical Information Sheet

### Patient ID

|  |  |  |  |  |  |  |  |
|--|--|--|--|--|--|--|--|
|  |  |  |  |  |  |  |  |
|--|--|--|--|--|--|--|--|

### 1. Sample information

|                  | Sample number | Date of Collection (dd/mm/yyyy) |
|------------------|---------------|---------------------------------|
| 1st blood sample | A.....        | / /                             |
| 2nd blood sample | B.....        | / /                             |
| CSF              | C.....        | / /                             |
| Others           | D.....        | / /                             |
|                  |               |                                 |

### 2. Patient basic information

|                                |                                                         |          |  |
|--------------------------------|---------------------------------------------------------|----------|--|
| Age                            |                                                         |          |  |
| Sex                            | M <input type="checkbox"/> / F <input type="checkbox"/> |          |  |
| Province of residence          |                                                         | District |  |
| Occupation                     |                                                         |          |  |
| Date of admission (dd/mm/yyyy) | / /                                                     |          |  |
| Date of discharge (dd/mm/yyyy) | / /                                                     |          |  |

### 3. Pre-hospital information

|                               |                            |                            |                                                                                                                                                                                                                                                                                                                                                                          |
|-------------------------------|----------------------------|----------------------------|--------------------------------------------------------------------------------------------------------------------------------------------------------------------------------------------------------------------------------------------------------------------------------------------------------------------------------------------------------------------------|
| Regular medication            | N <input type="checkbox"/> | Y <input type="checkbox"/> |                                                                                                                                                                                                                                                                                                                                                                          |
| Underlying disease            | N <input type="checkbox"/> | Y <input type="checkbox"/> | diabetes <input type="checkbox"/> , heart disease <input type="checkbox"/> , liver disease <input type="checkbox"/> , renal disease <input type="checkbox"/> (hemodialysis <input type="checkbox"/> ) , cerebrovascular disease <input type="checkbox"/> , cancer <input type="checkbox"/> , others.....                                                                 |
| Vaccination                   | N <input type="checkbox"/> | Y <input type="checkbox"/> | diphtheria <input type="checkbox"/> , tetanus <input type="checkbox"/> , pertussis <input type="checkbox"/> , measles <input type="checkbox"/> , rubella <input type="checkbox"/> , BCG <input type="checkbox"/> , HBV <input type="checkbox"/> , Meningococcal <input type="checkbox"/> , Hib <input type="checkbox"/> , typhoid <input type="checkbox"/> , others..... |
| Alcohol intake                | N <input type="checkbox"/> | Y <input type="checkbox"/> | everyday <input type="checkbox"/> , sometime <input type="checkbox"/>                                                                                                                                                                                                                                                                                                    |
| Smoking                       | N <input type="checkbox"/> | Y <input type="checkbox"/> | ...../ pack-year                                                                                                                                                                                                                                                                                                                                                         |
| Significant previous illness  | N <input type="checkbox"/> | Y <input type="checkbox"/> | .....                                                                                                                                                                                                                                                                                                                                                                    |
| Referral from other hospitals | N <input type="checkbox"/> | Y <input type="checkbox"/> | which hospital.....                                                                                                                                                                                                                                                                                                                                                      |

#### **4. Epidemiological information**

|                                                                              |                                                                                                                              |                                      |                                                                                                                                                                               |                                                                             |  |
|------------------------------------------------------------------------------|------------------------------------------------------------------------------------------------------------------------------|--------------------------------------|-------------------------------------------------------------------------------------------------------------------------------------------------------------------------------|-----------------------------------------------------------------------------|--|
| Residence                                                                    | central Hanoi <input type="checkbox"/> , not central Hanoi <input type="checkbox"/> , outside Hanoi <input type="checkbox"/> |                                      |                                                                                                                                                                               |                                                                             |  |
|                                                                              | urban <input type="checkbox"/> , rural <input type="checkbox"/>                                                              |                                      |                                                                                                                                                                               |                                                                             |  |
|                                                                              | flatland <input type="checkbox"/> , mountainous <input type="checkbox"/> , coastal <input type="checkbox"/>                  |                                      |                                                                                                                                                                               |                                                                             |  |
| Animal contact (within 1 month)<br>Pet, livestock, many seen<br>around house | N <input type="checkbox"/>                                                                                                   | Y <input type="checkbox"/>           | pig <input type="checkbox"/> , chicken <input type="checkbox"/> , rat <input type="checkbox"/> , dog <input type="checkbox"/> , cat <input type="checkbox"/> ,<br>others..... |                                                                             |  |
| Insect bite (within 1 month)                                                 | N <input type="checkbox"/>                                                                                                   | do not know <input type="checkbox"/> | Y <input type="checkbox"/>                                                                                                                                                    | tick <input type="checkbox"/> , mite <input type="checkbox"/> , others..... |  |
| Travel history (within 1 month)                                              | N <input type="checkbox"/>                                                                                                   | Y <input type="checkbox"/>           | where.....                                                                                                                                                                    |                                                                             |  |
| Similar symptom in family                                                    | N <input type="checkbox"/>                                                                                                   | Y <input type="checkbox"/>           | who.....                                                                                                                                                                      |                                                                             |  |

#### **5. Clinical manifestation**

|                                                                                                                                                 |                                                                                                                   |                            |                       |                            |                            |
|-------------------------------------------------------------------------------------------------------------------------------------------------|-------------------------------------------------------------------------------------------------------------------|----------------------------|-----------------------|----------------------------|----------------------------|
| Duration of fever before admission (days)                                                                                                       |                                                                                                                   |                            |                       |                            |                            |
| Onset of fever<br>Sudden; over 1-2 days<br>Progressive; over 3-5 days                                                                           | sudden <input type="checkbox"/> , gradual <input type="checkbox"/>                                                |                            |                       |                            |                            |
| Character of fever<br>continous; high temp. without falling<br>intermittent; sometimes normal temp.<br>periodical; repeating every several days | continuous <input type="checkbox"/> , intermittent <input type="checkbox"/> , periodical <input type="checkbox"/> |                            |                       |                            |                            |
| Any symptoms below during the period from onset to admission?                                                                                   |                                                                                                                   |                            |                       |                            |                            |
| headache                                                                                                                                        | N <input type="checkbox"/>                                                                                        | Y <input type="checkbox"/> | abdominal pain        | N <input type="checkbox"/> | Y <input type="checkbox"/> |
| sore throat                                                                                                                                     | N <input type="checkbox"/>                                                                                        | Y <input type="checkbox"/> | nausea/vomiting       | N <input type="checkbox"/> | Y <input type="checkbox"/> |
| myalgia                                                                                                                                         | N <input type="checkbox"/>                                                                                        | Y <input type="checkbox"/> | back pain             | N <input type="checkbox"/> | Y <input type="checkbox"/> |
| rigor                                                                                                                                           | N <input type="checkbox"/>                                                                                        | Y <input type="checkbox"/> | joint pain            | N <input type="checkbox"/> | Y <input type="checkbox"/> |
| chest pain                                                                                                                                      | N <input type="checkbox"/>                                                                                        | Y <input type="checkbox"/> | loss of consciousness | N <input type="checkbox"/> | Y <input type="checkbox"/> |
| cough                                                                                                                                           | N <input type="checkbox"/>                                                                                        | Y <input type="checkbox"/> | mental change         | N <input type="checkbox"/> | Y <input type="checkbox"/> |

#### **6. Physical findings around admission**

|                         |                         |      |
|-------------------------|-------------------------|------|
| Blood pressure          | /                       | mmHg |
| Heart rate (pulse rate) | /min                    |      |
| Respiratory rate        | /min                    |      |
| SpO2                    | %                       |      |
| Consciousness           | Glasgow coma scale..... |      |

| Structure              | small <input type="checkbox"/> , moderate <input type="checkbox"/> , tall <input type="checkbox"/> |                            | fat <input type="checkbox"/> , thin <input type="checkbox"/>                                                                                            |                                                                                                                                                                                                                                  |
|------------------------|----------------------------------------------------------------------------------------------------|----------------------------|---------------------------------------------------------------------------------------------------------------------------------------------------------|----------------------------------------------------------------------------------------------------------------------------------------------------------------------------------------------------------------------------------|
| Injected conjunctiva   | N <input type="checkbox"/>                                                                         | Y <input type="checkbox"/> |                                                                                                                                                         |                                                                                                                                                                                                                                  |
| Anemic conjunctiva     | N <input type="checkbox"/>                                                                         | Y <input type="checkbox"/> |                                                                                                                                                         |                                                                                                                                                                                                                                  |
| Icteric conjunctiva    | N <input type="checkbox"/>                                                                         | Y <input type="checkbox"/> |                                                                                                                                                         |                                                                                                                                                                                                                                  |
| Injected throat        | N <input type="checkbox"/>                                                                         | Y <input type="checkbox"/> |                                                                                                                                                         |                                                                                                                                                                                                                                  |
| Lung rale              | N <input type="checkbox"/>                                                                         | Y <input type="checkbox"/> | right <input type="checkbox"/> , left <input type="checkbox"/> , both <input type="checkbox"/>                                                          | wheeze <input type="checkbox"/> , crackle <input type="checkbox"/>                                                                                                                                                               |
| Heart murmur           | N <input type="checkbox"/>                                                                         | Y <input type="checkbox"/> | systolic <input type="checkbox"/> , diastolic <input type="checkbox"/>                                                                                  |                                                                                                                                                                                                                                  |
| Abdominal tenderness   | N <input type="checkbox"/>                                                                         | Y <input type="checkbox"/> | right upper <input type="checkbox"/> , left upper <input type="checkbox"/> , right lower <input type="checkbox"/> , left lower <input type="checkbox"/> |                                                                                                                                                                                                                                  |
| Abdominal distention   | N <input type="checkbox"/>                                                                         | Y <input type="checkbox"/> |                                                                                                                                                         |                                                                                                                                                                                                                                  |
| Hepatomegaly           | N <input type="checkbox"/>                                                                         | Y <input type="checkbox"/> |                                                                                                                                                         |                                                                                                                                                                                                                                  |
| Splenomegaly           | N <input type="checkbox"/>                                                                         | Y <input type="checkbox"/> |                                                                                                                                                         |                                                                                                                                                                                                                                  |
| CVAknocking tenderness | N <input type="checkbox"/>                                                                         | Y <input type="checkbox"/> | right <input type="checkbox"/> , left <input type="checkbox"/> , both <input type="checkbox"/>                                                          |                                                                                                                                                                                                                                  |
| Edema                  | N <input type="checkbox"/>                                                                         | Y <input type="checkbox"/> | leg <input type="checkbox"/> , face <input type="checkbox"/> , others.....                                                                              |                                                                                                                                                                                                                                  |
| Skin congestion        | N <input type="checkbox"/>                                                                         | Y <input type="checkbox"/> |                                                                                                                                                         |                                                                                                                                                                                                                                  |
| Rash                   | N <input type="checkbox"/>                                                                         | Y <input type="checkbox"/> | body <input type="checkbox"/> , legs <input type="checkbox"/> ,<br>others.....                                                                          | macular <input type="checkbox"/> , papular <input type="checkbox"/> ,<br>maculopapular <input type="checkbox"/> , blister <input type="checkbox"/> ,<br>hemorrhagic <input type="checkbox"/> , erythema <input type="checkbox"/> |
| Eschar                 | N <input type="checkbox"/>                                                                         | Y <input type="checkbox"/> | body <input type="checkbox"/> , legs <input type="checkbox"/> ,<br>others.....                                                                          | Number; 1 <input type="checkbox"/> , 2 or more <input type="checkbox"/>                                                                                                                                                          |
| Lymphnode swelling     | N <input type="checkbox"/>                                                                         | Y <input type="checkbox"/> | neck <input type="checkbox"/> , axilla <input type="checkbox"/> ,<br>inguinale <input type="checkbox"/>                                                 | Number; 1 <input type="checkbox"/> , 2 or more <input type="checkbox"/>                                                                                                                                                          |
| Joint swelling         | N <input type="checkbox"/>                                                                         | Y <input type="checkbox"/> | knee <input type="checkbox"/> , ankle <input type="checkbox"/> , elbow <input type="checkbox"/> , wrist <input type="checkbox"/> , others.....          |                                                                                                                                                                                                                                  |
| Calf tenderness        | N <input type="checkbox"/>                                                                         | Y <input type="checkbox"/> |                                                                                                                                                         |                                                                                                                                                                                                                                  |
| Neck stiffness         | N <input type="checkbox"/>                                                                         | Y <input type="checkbox"/> |                                                                                                                                                         |                                                                                                                                                                                                                                  |
| Paralysis              | N <input type="checkbox"/>                                                                         | Y <input type="checkbox"/> | right <input type="checkbox"/> , left <input type="checkbox"/> , others.....                                                                            |                                                                                                                                                                                                                                  |

## **7. Laboratory data and imaging**

|                                            |  |            |                          |         |  |
|--------------------------------------------|--|------------|--------------------------|---------|--|
| 1st basic routine lab data after admission |  |            | date (...../...../.....) |         |  |
| WBC                                        |  | ALP        |                          | Na      |  |
| Neu                                        |  | Tbil       |                          | K       |  |
| Hb                                         |  | Dbil       |                          | Cl      |  |
| Ht                                         |  | TP         |                          | Ca      |  |
| Plt                                        |  | Alb        |                          | Glucose |  |
| sGOT                                       |  | UN         |                          | CRP     |  |
| sGPT                                       |  | Creatinine |                          |         |  |

|                  |                                                                                                                                                                          |                                                                                                                                         |                                                                     |                                                         |  |
|------------------|--------------------------------------------------------------------------------------------------------------------------------------------------------------------------|-----------------------------------------------------------------------------------------------------------------------------------------|---------------------------------------------------------------------|---------------------------------------------------------|--|
| Further lab data |                                                                                                                                                                          |                                                                                                                                         |                                                                     |                                                         |  |
| HIV              | positive <input type="checkbox"/> , negative <input type="checkbox"/> , not checked <input type="checkbox"/>                                                             |                                                                                                                                         |                                                                     | CD4 count                                               |  |
| Cultures         | blood <input type="checkbox"/> , sputum <input type="checkbox"/> , urine <input type="checkbox"/> , CSF <input type="checkbox"/> , others <input type="checkbox"/> ..... |                                                                                                                                         |                                                                     | result                                                  |  |
| CSF analysis     | date...../...../.....                                                                                                                                                    | protein....., glucose....., cells.....<br>(neutro.....%, lymph.....%)                                                                   |                                                                     |                                                         |  |
| Serology         | for.....                                                                                                                                                                 | blood <input type="checkbox"/> , CSF <input type="checkbox"/>                                                                           | date...../...../.....                                               | result                                                  |  |
| PCR              | for.....                                                                                                                                                                 | blood <input type="checkbox"/> , CSF <input type="checkbox"/> , sputum <input type="checkbox"/> , others <input type="checkbox"/> ..... | result                                                              |                                                         |  |
| ANA              |                                                                                                                                                                          | Other tests                                                                                                                             |                                                                     |                                                         |  |
| Biopsy           | date...../...../.....                                                                                                                                                    | specimen                                                                                                                                |                                                                     | result                                                  |  |
| Imaging study    |                                                                                                                                                                          |                                                                                                                                         |                                                                     |                                                         |  |
| Chest X ray      | normal <input type="checkbox"/>                                                                                                                                          | infiltrate <input type="checkbox"/> , consolidation <input type="checkbox"/>                                                            | single <input type="checkbox"/> , multiple <input type="checkbox"/> | R <input type="checkbox"/> , L <input type="checkbox"/> |  |
| Abdominal US     | normal <input type="checkbox"/>                                                                                                                                          | result                                                                                                                                  |                                                                     |                                                         |  |
| CT               | chest <input type="checkbox"/> , brain <input type="checkbox"/> ,<br>(...../...../.....) abdominal <input type="checkbox"/> , others <input type="checkbox"/>            |                                                                                                                                         | normal <input type="checkbox"/> , result.....                       |                                                         |  |
| MRI              | brain <input type="checkbox"/> , others <input type="checkbox"/>                                                                                                         |                                                                                                                                         | normal <input type="checkbox"/> , result.....                       |                                                         |  |
|                  | (...../...../.....)                                                                                                                                                      |                                                                                                                                         |                                                                     |                                                         |  |

### 8. Final diagnosis

|                            |                                                                                                          |
|----------------------------|----------------------------------------------------------------------------------------------------------|
| N <input type="checkbox"/> | Y; clinical diagnosis <input type="checkbox"/> ....., confirmed diagnosis <input type="checkbox"/> ..... |
|----------------------------|----------------------------------------------------------------------------------------------------------|

### 9. Treatment

|                 |                       |  |        |  |      |
|-----------------|-----------------------|--|--------|--|------|
| 1st Antibiotics | from...../...../..... |  | g/day  |  | days |
| 2nd Antibiotics | from...../...../..... |  | g/day  |  | days |
| 3rd Antibiotics | from...../...../..... |  | g/day  |  | days |
|                 |                       |  |        |  |      |
| Steroid         | from...../...../..... |  | mg/day |  | days |
| Other Tx        | from...../...../..... |  |        |  |      |
|                 |                       |  |        |  |      |

### 10. Hospital course

|                       |                                                                                                                                                         |
|-----------------------|---------------------------------------------------------------------------------------------------------------------------------------------------------|
| Patient status        | recovery <input type="checkbox"/> , sequelae <input type="checkbox"/> , died <input type="checkbox"/> , discharge w/o recovery <input type="checkbox"/> |
| Defervescence         | date ...../...../.....                                                                                                                                  |
| Disappearance of rash | date ...../...../.....                                                                                                                                  |
| Drug adverse effects  | N <input type="checkbox"/> , Y.....                                                                                                                     |
